# Supplementary material for: ETSI compliant GeoNetworking protocol layer implementation for IVC simulations
Source: Springer Nature journal article supplement (doi:10.1186/2192-1962-3-4), 2013-03-25
Supplement: 13673_2012_34_MOESM1_ESM.pdf [file 13673_2012_34_MOESM1_ESM.pdf]

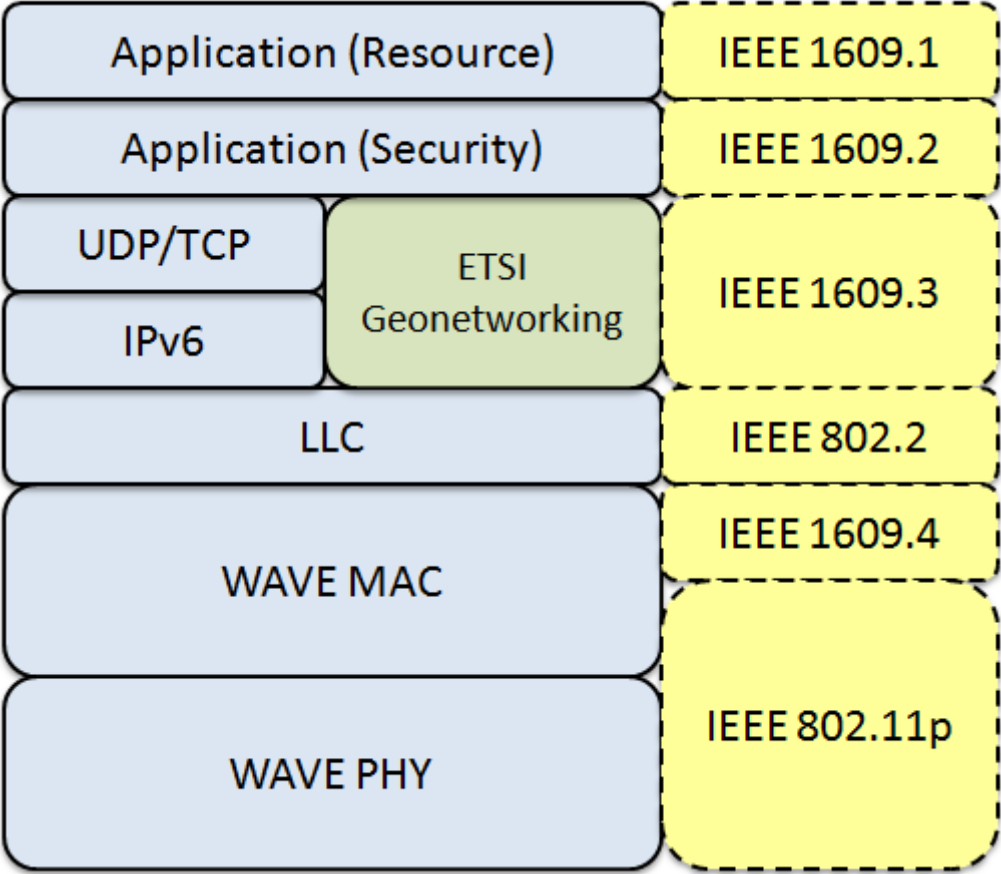

Application (Resource)

IEEE 1609.1

Application (Security)

IEEE 1609.2

UDP/TCP

ETSI

IEEE 1609.3

IPv6

Geonetworking

LLC

IEEE 802.2

WAVE MAC

IEEE 1609.4

WAVE PHY

IEEE 802.11p
