# Supplementary material for: ETSI compliant GeoNetworking protocol layer implementation for IVC simulations
Source: Springer Nature journal article supplement (doi:10.1186/2192-1962-3-4), 2013-03-25
Supplement: 13673_2012_34_MOESM2_ESM.pdf [file 13673_2012_34_MOESM2_ESM.pdf]

ETSI Geonetworking

Socket  
API

User  
Application

NCTUns API functions

Simulation Engine
