# Supplementary material for: ETSI compliant GeoNetworking protocol layer implementation for IVC simulations
Source: Springer Nature journal article supplement (doi:10.1186/2192-1962-3-4), 2013-03-25

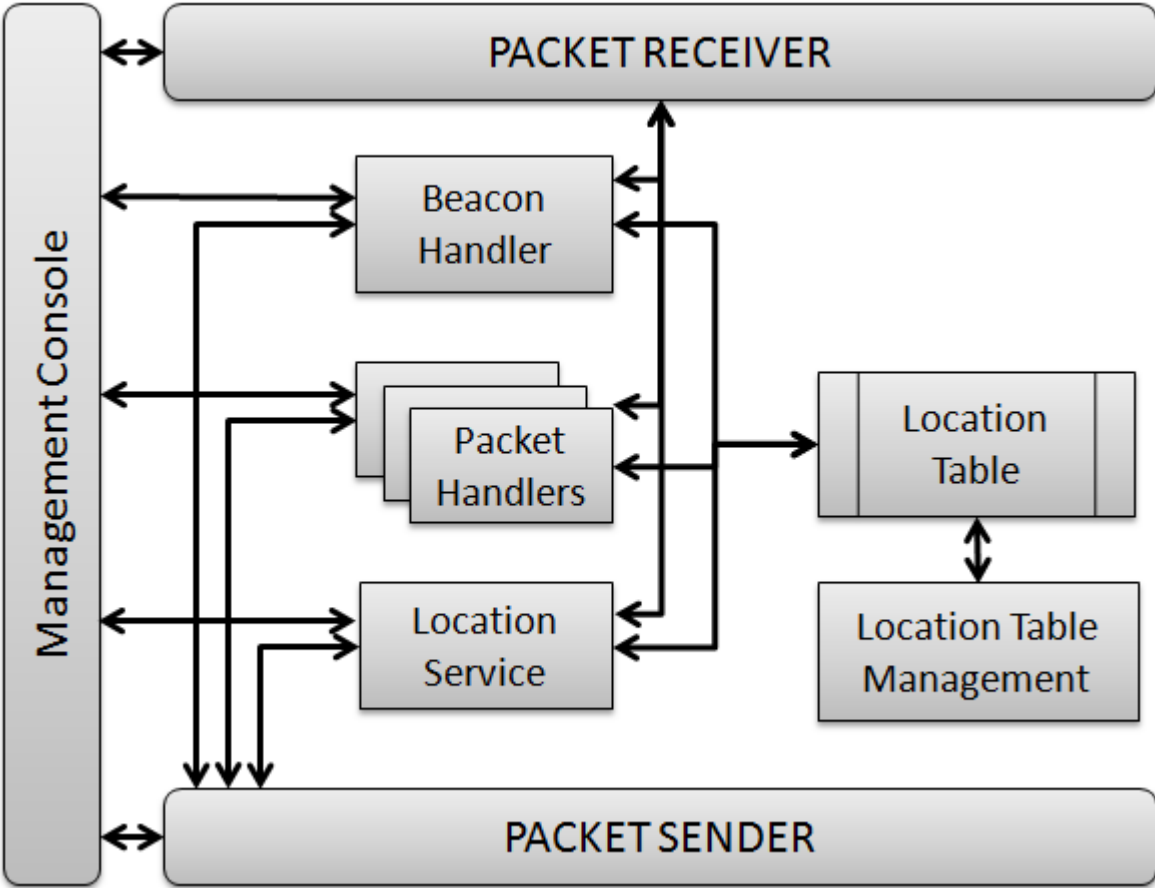

Supplement: 13673_2012_34_MOESM3_ESM.pdf [file 13673_2012_34_MOESM3_ESM.pdf]
